# Supplementary material for: Cu(ii) complexes of N-rich aroylhydrazone: magnetism and catalytic activity towards microwave-assisted oxidation of xylenes
Source: Royal Society of Chemistry journal article supplement (doi:10.1039/c9dt02196e), 2019-01-01
Supplement: c9dt02196e1.pdf [file c9dt02196e1.pdf]

## Supporting Information

### **Cu(II) complexes of *N*-rich aroylhydrazone: magnetism and catalytic activity towards microwave-assisted oxidation of xylenes**

Manas Sutradhar,<sup>\*a</sup> Tannistha Roy Barman,<sup>a</sup> Elisabete C.B.A. Alegria,<sup>\*a,b</sup> M. Fátima C. Guedes da Silva,<sup>a</sup> Cai-Ming Liu,<sup>c</sup> Hui-Zhong Kou,<sup>d</sup> and Armando J. L. Pombeiro<sup>\*a</sup>

**Table S1.** Selected bond distances (Å) and angles (°) in complexes **1-3**.

**1**

|         |             |
|---------|-------------|
| Cu1—N3  | 1.9824 (16) |
| Cu1—N1  | 2.0171 (19) |
| Cu1—O1  | 2.0921 (16) |
| Cu1—Cl2 | 2.2255 (7)  |
| Cu1—Cl1 | 2.4606 (11) |
| Cu2—N4  | 1.9376 (16) |
| Cu2—N2  | 2.0300 (18) |
| Cu2—N5  | 2.0369 (19) |
| Cu2—Cl3 | 2.2260 (7)  |
| Cu2—O2  | 2.318 (2)   |

|             |            |            |            |
|-------------|------------|------------|------------|
| N3—Cu1—N1   | 78.13 (6)  | N4—Cu2—N2  | 89.60 (6)  |
| N3—Cu1—O1   | 77.71 (6)  | N4—Cu2—N5  | 79.77 (6)  |
| N1—Cu1—O1   | 154.62 (6) | N2—Cu2—N5  | 165.69 (7) |
| N3—Cu1—Cl2  | 153.85 (5) | N4—Cu2—Cl3 | 151.23 (5) |
| N1—Cu1—Cl2  | 99.57 (5)  | N2—Cu2—Cl3 | 99.29 (5)  |
| O1—Cu1—Cl2  | 98.68 (5)  | N5—Cu2—Cl3 | 94.60 (5)  |
| N3—Cu1—Cl1  | 102.23 (5) | N4—Cu2—O2  | 101.40 (7) |
| N1—Cu1—Cl1  | 94.79 (7)  | N2—Cu2—O2  | 88.26 (8)  |
| O1—Cu1—Cl1  | 97.77 (6)  | N5—Cu2—O2  | 84.53 (8)  |
| Cl2—Cu1—Cl1 | 103.92 (3) | Cl3—Cu2—O2 | 106.15 (5) |

## 2

|        |            |         |            |
|--------|------------|---------|------------|
| N1—Cu1 | 1.981 (11) | N10—Cu4 | 2.065 (15) |
| N2—Cu3 | 2.013 (11) | O1—Cu3  | 2.025 (9)  |
| N3—Cu1 | 2.063 (11) | O4—Cu2  | 2.008 (9)  |
| N4—Cu1 | 2.043 (9)  | Cl1—Cu1 | 2.238 (3)  |
| N5—Cu3 | 2.014 (10) | Cl2—Cu2 | 2.237 (3)  |
| N6—N7  | 1.302 (14) | Cl3—Cu3 | 2.279 (3)  |
| N6—Cu2 | 1.956 (12) | Cl3—Cu4 | 2.693 (3)  |
| N7—Cu4 | 1.985 (11) | Cl4—Cu4 | 2.205 (3)  |
| N8—Cu2 | 2.028 (10) | Cl5—Cu2 | 2.424 (3)  |
| N9—Cu4 | 1.981 (16) | Cl6—Cu3 | 2.373 (3)  |

|             |             |             |             |
|-------------|-------------|-------------|-------------|
| N1—Cu1—N4   | 90.8 (4)    | N5—Cu3—O1   | 155.4 (4)   |
| N1—Cu1—N3   | 78.5 (4)    | N2—Cu3—Cl3  | 141.2 (3)   |
| N4—Cu1—N3   | 168.9 (4)   | N5—Cu3—Cl3  | 100.2 (3)   |
| N1—Cu1—Cl1  | 168.3 (3)   | O1—Cu3—Cl3  | 98.6 (3)    |
| N4—Cu1—Cl1  | 97.8 (3)    | N2—Cu3—Cl6  | 114.6 (3)   |
| N3—Cu1—Cl1  | 93.2 (3)    | N5—Cu3—Cl6  | 95.2 (3)    |
| N6—Cu2—O4   | 80.8 (5)    | O1—Cu3—Cl6  | 95.4 (3)    |
| N6—Cu2—N8   | 76.4 (4)    | Cl3—Cu3—Cl6 | 104.15 (12) |
| O4—Cu2—N8   | 156.0 (4)   | N9—Cu4—N7   | 91.4 (4)    |
| N6—Cu2—Cl2  | 150.4 (3)   | N9—Cu4—N10  | 166.6 (5)   |
| O4—Cu2—Cl2  | 96.2 (3)    | N7—Cu4—N10  | 76.9 (5)    |
| N8—Cu2—Cl2  | 99.8 (3)    | N9—Cu4—Cl4  | 98.9 (3)    |
| N6—Cu2—Cl5  | 104.9 (3)   | N7—Cu4—Cl4  | 158.0 (3)   |
| O4—Cu2—Cl5  | 100.4 (3)   | N10—Cu4—Cl4 | 94.3 (4)    |
| N8—Cu2—Cl5  | 92.8 (3)    | N9—Cu4—Cl3  | 87.5 (3)    |
| Cl2—Cu2—Cl5 | 104.65 (13) | N7—Cu4—Cl3  | 100.0 (3)   |
| N2—Cu3—N5   | 76.6 (4)    | N10—Cu4—Cl3 | 88.2 (4)    |
| N2—Cu3—O1   | 78.8 (4)    | Cl4—Cu4—Cl3 | 99.83 (13)  |

## 3

|        |             |         |             |
|--------|-------------|---------|-------------|
| Cu1—N3 | 1.9443 (10) | Cu2—N5  | 2.0522 (10) |
| Cu1—O4 | 1.9496 (9)  | Cu2—O16 | 2.2508 (9)  |
| Cu1—N1 | 1.9997 (11) | Cu3—O11 | 1.9729 (9)  |
| Cu1—O1 | 2.0371 (9)  | Cu3—O12 | 1.9818 (9)  |
| Cu1—O3 | 2.3442 (10) | Cu3—N6  | 2.0007 (10) |
| Cu2—N4 | 1.9153 (10) | Cu3—O10 | 2.0346 (10) |

|        |             |                       |             |
|--------|-------------|-----------------------|-------------|
| Cu2—O7 | 1.9932 (9)  | Cu3—O15 <sup>i</sup>  | 2.2497 (10) |
| Cu2—N2 | 2.0166 (10) | O15—Cu3 <sup>ii</sup> | 2.2498 (10) |

|           |            |                          |            |
|-----------|------------|--------------------------|------------|
| N3—Cu1—O4 | 176.85 (4) | N2—Cu2—N5                | 169.25 (4) |
| N3—Cu1—N1 | 79.65 (4)  | N4—Cu2—O16               | 104.35 (4) |
| O4—Cu1—N1 | 99.44 (4)  | O7—Cu2—O16               | 82.71 (3)  |
| N3—Cu1—O1 | 79.85 (4)  | N2—Cu2—O16               | 96.12 (4)  |
| O4—Cu1—O1 | 101.40 (4) | N5—Cu2—O16               | 81.33 (4)  |
| N1—Cu1—O1 | 158.32 (4) | O11—Cu3—O12              | 86.98 (4)  |
| N3—Cu1—O3 | 87.66 (4)  | O11—Cu3—N6               | 172.33 (4) |
| O4—Cu1—O3 | 89.40 (4)  | O12—Cu3—N6               | 90.55 (4)  |
| N1—Cu1—O3 | 93.80 (4)  | O11—Cu3—O10              | 94.20 (4)  |
| O1—Cu1—O3 | 92.36 (4)  | O12—Cu3—O10              | 136.78 (4) |
| N4—Cu2—O7 | 167.41 (4) | N6—Cu3—O10               | 92.58 (4)  |
| N4—Cu2—N2 | 90.35 (4)  | O11—Cu3—O15 <sup>i</sup> | 88.17 (4)  |
| O7—Cu2—N2 | 99.36 (4)  | O12—Cu3—O15 <sup>i</sup> | 132.05 (4) |
| N4—Cu2—N5 | 80.24 (4)  | N6—Cu3—O15 <sup>i</sup>  | 88.10 (4)  |
| O7—Cu2—N5 | 90.71 (4)  | O10—Cu3—O15 <sup>i</sup> | 91.15 (4)  |

Symmetry codes: (i)  $x+1/2, -y+1/2, z-1/2$ ; (ii)  $x-1/2, -y+1/2, z+1/2$ .

**Table S2** - MW-assisted oxidation of xylene isomers by H<sub>2</sub>O<sub>2</sub> (30% aq) at 50°C in presence of HNO<sub>3</sub> using **1-3** as catalyst precursors.<sup>a</sup>

| Entry | Catalyst | Substrate        | Additive<br>n(HNO <sub>3</sub> )/n(cat) | Yield (%) |          |      |                    |
|-------|----------|------------------|-----------------------------------------|-----------|----------|------|--------------------|
|       |          |                  |                                         | Alcohol   | Aldehyde | Acid | Total <sup>b</sup> |
| 1     | <b>1</b> | <i>o</i> -xylene | 10                                      | 0.5       | 3.5      | 0.4  | 4.4                |
| 2     |          |                  | 25                                      | 0.9       | 0.8      | 1.3  | 3.0                |
| 3     |          |                  | 50                                      | 1         | 1        | 1.2  | 3.2                |
| 4     |          | <i>m</i> -xylene | 10                                      | 1.2       | 3.4      | 0.9  | 6.0                |
| 5     |          |                  | 25                                      | 3.1       | 2.5      | 1.8  | 7.4                |
| 6     |          |                  | 50                                      | 3.1       | 3.3      | 2    | 8.4                |
| 7     |          | <i>p</i> -xylene | 10                                      | 2.9       | 3.4      | 3.4  | 9.7                |
| 8     |          |                  | 25                                      | 3         | 3.4      | 2.9  | 9.3                |
| 9     |          |                  | 50                                      | 3.1       | 2.5      | 1.8  | 9.1                |
| 10    | <b>2</b> | <i>o</i> -xylene | 10                                      | 0.3       | 2.3      | 0.3  | 2.9                |
| 11    |          |                  | 25                                      | 0.9       | 1.5      | 0.8  | 3.2                |
| 12    |          |                  | 50                                      | 0.4       | 1.1      | 0.6  | 2.1                |

|    |                  |                  |     |     |     |      |      |
|----|------------------|------------------|-----|-----|-----|------|------|
| 13 | <b>3</b>         | <i>m</i> -xylene | 10  | 2.3 | 3.3 | 1.5  | 7.1  |
| 14 |                  |                  | 25  | 2.4 | 5.6 | 3.8  | 11.9 |
| 15 |                  |                  | 50  | 4.5 | 2.3 | 3    | 9.7  |
| 16 |                  | <i>p</i> -xylene | 10  | 1.6 | 2.7 | 1.5  | 5.9  |
| 17 |                  |                  | 25  | 2.4 | 1.6 | 2.5  | 6.5  |
| 18 |                  |                  | 50  | 2.8 | 1.6 | 2.6  | 7.0  |
| 19 |                  | <i>o</i> -xylene | 10  | 1.1 | 4   | 0.6  | 5.7  |
| 20 |                  |                  | 25  | 1   | 3.2 | 0.6  | 4.8  |
| 21 |                  |                  | 50  | 1.1 | 5.1 | 0.7  | 6.8  |
| 23 | <i>m</i> -xylene | 10               | 3.5 | 5.5 | 2.4 | 11.4 |      |
| 24 |                  | 25               | 6.9 | 3.9 | 4.2 | 15   |      |
| 25 |                  | 50               | 4.5 | 3.2 | 3.1 | 10.8 |      |
| 26 | <i>m</i> -xylene | 10               | 3.1 | 3.1 | 2.7 | 8.9  |      |
| 27 |                  | 25               | 3.4 | 2.2 | 3.4 | 8.9  |      |
| 28 |                  | 50               | 3.2 | 2.4 | 3.3 | 8.8  |      |

<sup>a</sup>Reaction conditions: *o*-, *m*-, or *p*-xylene (5 mmol), catalyst precursor **1**, **2** or **3** (10  $\mu$ mol), H<sub>2</sub>O<sub>2</sub> (30% aq.) (10 mmol), NCMe (3 mL), additive HNO<sub>3</sub> (n/n= 10, 25 or 50), MW, 3 h, 50  $^{\circ}$ C. <sup>b</sup>Moles of products [alcohol + aldehyde + acid]/100 mol of xylene isomer, determined by GC.

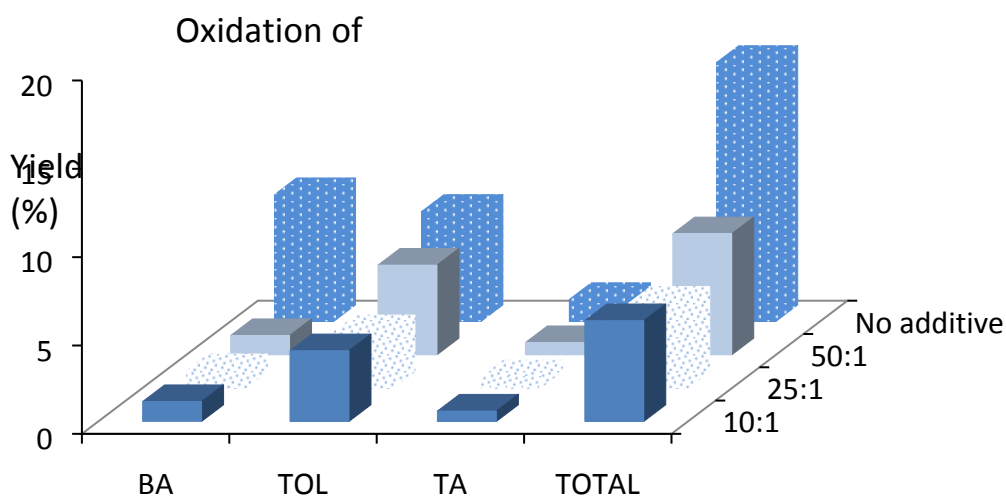

**Fig. S1** Effect of HNO<sub>3</sub> additive on the peroxidative oxidation of *o*-xylene in presence of **3**. Reaction conditions: *o*-xylene (5 mmol), **3** (10  $\mu$ mol), H<sub>2</sub>O<sub>2</sub> 30% aq. sol. (10 mmol), NCMe (3 mL), additive HNO<sub>3</sub> [n(HNO<sub>3</sub>)/n(cat) = 10, 25 or 50], 50  $^{\circ}$ C, 3 h under MW-irradiation (5 W).

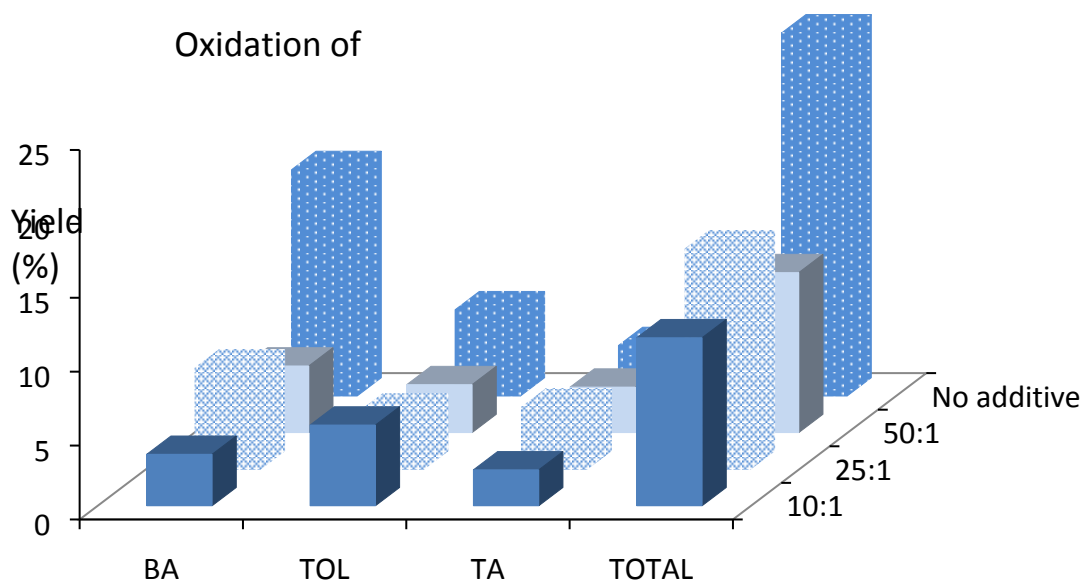

**Fig. S2** Effect of HNO<sub>3</sub> additive on the peroxidative oxidation of *m*-xylene in presence of **3**. Reaction conditions: *m*-xylene (5 mmol), **3** (10 μmol), H<sub>2</sub>O<sub>2</sub> 30% aq. sol. (10 mmol), NCMe (3 mL), additive HNO<sub>3</sub> [n(HNO<sub>3</sub>)/n(cat) = 10, 25 or 50], 50 °C, 3 h under MW-irradiation (5 W).
